# Supplementary material for: Antibody-directed extracellular proximity biotinylation reveals that Contactin-1 regulates axo-axonic innervation of axon initial segments
Source: PubMed Central journal article supplement (PMC10603070; doi:10.1038/s41467-023-42273-8), 2023-10-26
Supplement: 41467_2023_42273_MOESM1_ESM.pdf [file 41467_2023_42273_MOESM1_ESM.pdf]

## **SUPPLEMENTARY INFORMATION**

**Antibody-directed extracellular proximity biotinylation reveals Contactin-1 regulates axo-axonic innervation of axon initial segments.**

Ogawa and Lim *et al.*

**Supplementary information includes:**

**Supplementary Figures S1-S8**

**Supplementary extended materials**, detailed listing of all reagents, plasmids, antibodies, sources, etc.

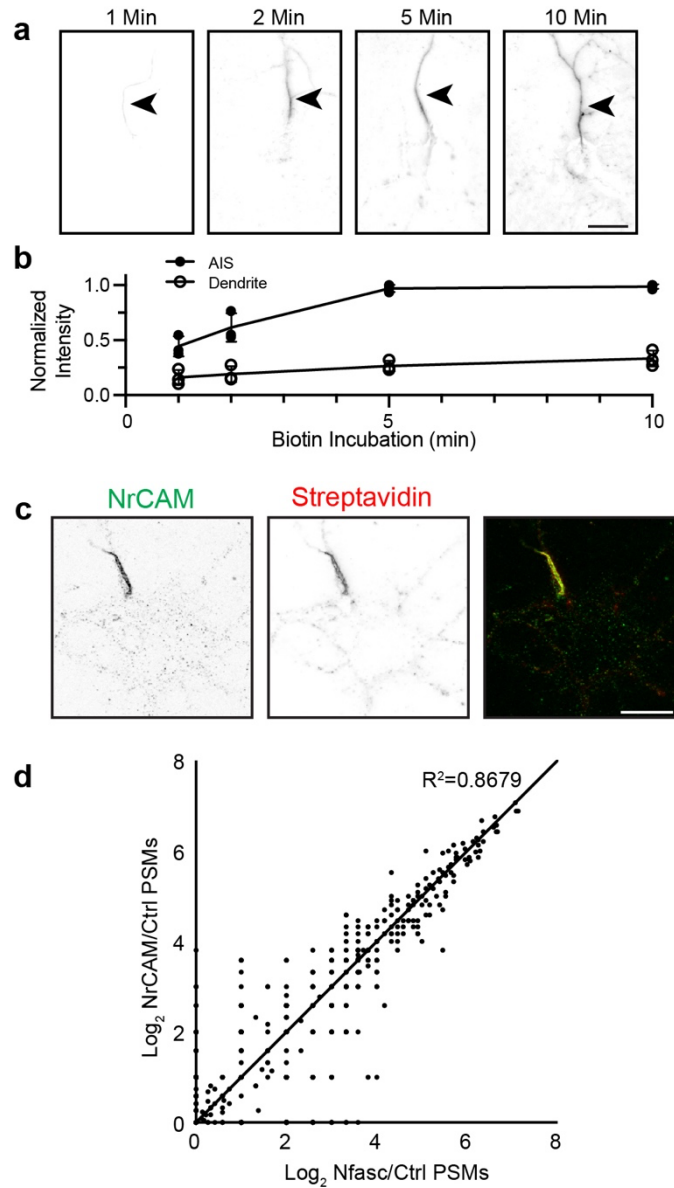

**Figure S1. BAR-Nfasc and BAR-NrCAM are highly concordant.** **a, b**, Streptavidin labeling (i.e. biotinylation) of the AIS (arrowhead) as a function of biotin-tyramide incubation time. N = 3 independent experiments. Error bars,  $\pm$ SEM. Scale bar, 20  $\mu$ m. **c**, Fluorescence imaging of DIV14 rat hippocampal neurons labeled by NrCAM-BAR. NrCAM immunofluorescence (green) enrichment defines the AIS. Biotinylated proteins were detected using Alexa594-conjugated streptavidin. Scale bar, 20  $\mu$ m. **d**, Scatter plot of the number of peptide spectral matches

(PSMs) for each biotinylated protein identified by mass spectrometry using either Nfasc-BAR or NrCAM-BAR. Data were highly concordant since most proteins identified fell on or close to the solid line representing equal enrichment in both BAR conditions. N=1 experiment.

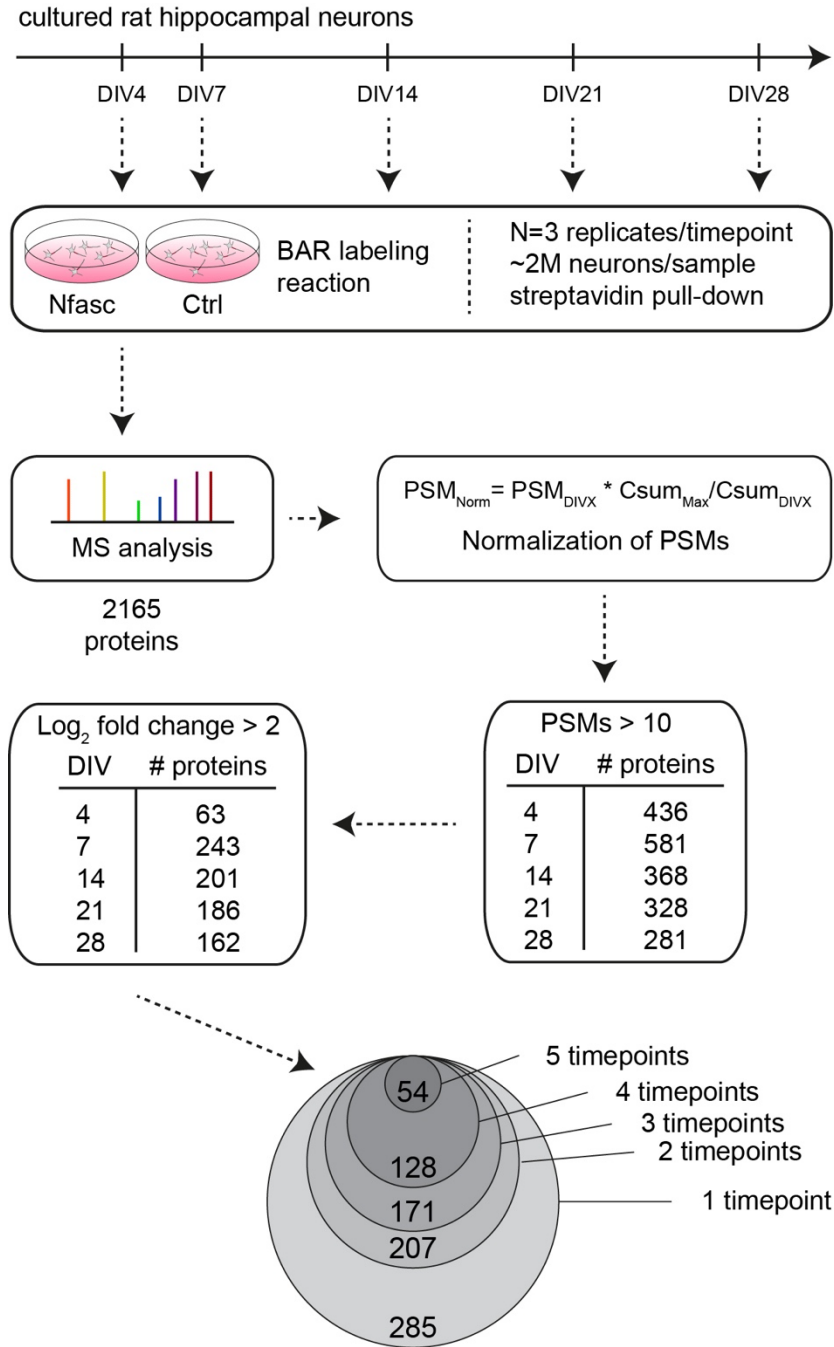

**Figure S2. Workflow of Nfasc-BAR labeling and normalization of PSMs.** Nfasc-BAR labeling was performed three times independently for each developmental timepoint with 2 million neurons per experiment. Mass spectrometry analysis resulted in a dataset of 2165 proteins. To compare across timepoints, PSMs were normalized using the formula  $PSM_{i, Norm, DivX} = PSM_{i, DivX} * Csum_{Max} / Csum_{DivX}$

$SPSM_{\text{Carboxylases}}^{\text{Div}Y} / SPSM_{\text{Carboxylases}}^{\text{Div}X}$ , where  $i$  is a particular protein on the set,  $X$  is a Div time point,  $Y$  is the Div time point with the maximum value for summed carboxylase PSMs.

Candidates were distinguished from background by filtering based on the number of PSMs identified and the fold change. Supplementary data files show the number of proteins that satisfied one or both criteria at a given timepoint. Circles show the number of proteins that satisfied both criteria for 1-5 timepoints.

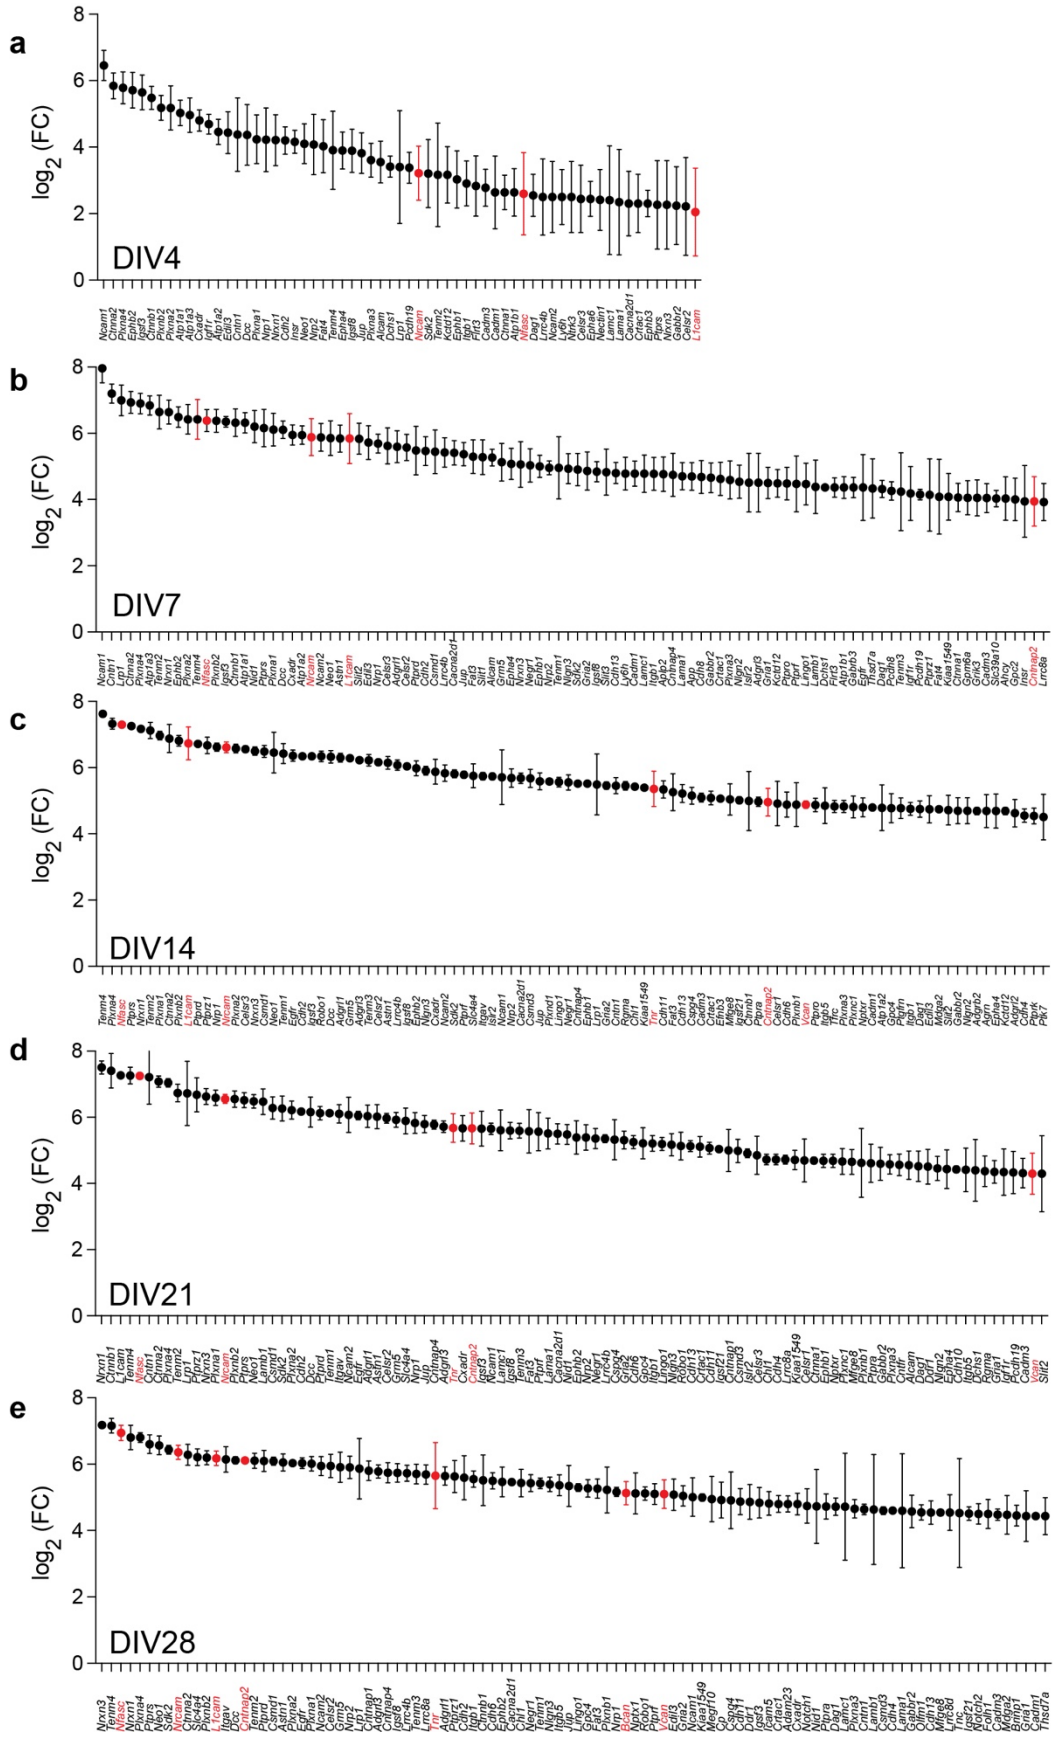

**Figure S3. Fold-enrichment for the top 100 most enriched proteins identified using Nfasc-BAR during *in vitro* neuron development.** a-e, Log<sub>2</sub> fold-change (log<sub>2</sub>(FC)) for the top 100 most enriched proteins identified at DIV 4 (**a**), 7 (**b**), 14 (**c**), 21 (**d**) and 28 (**e**). Known AIS proteins are indicated in red. Error bars, ±SEM. N=3 for each time point.

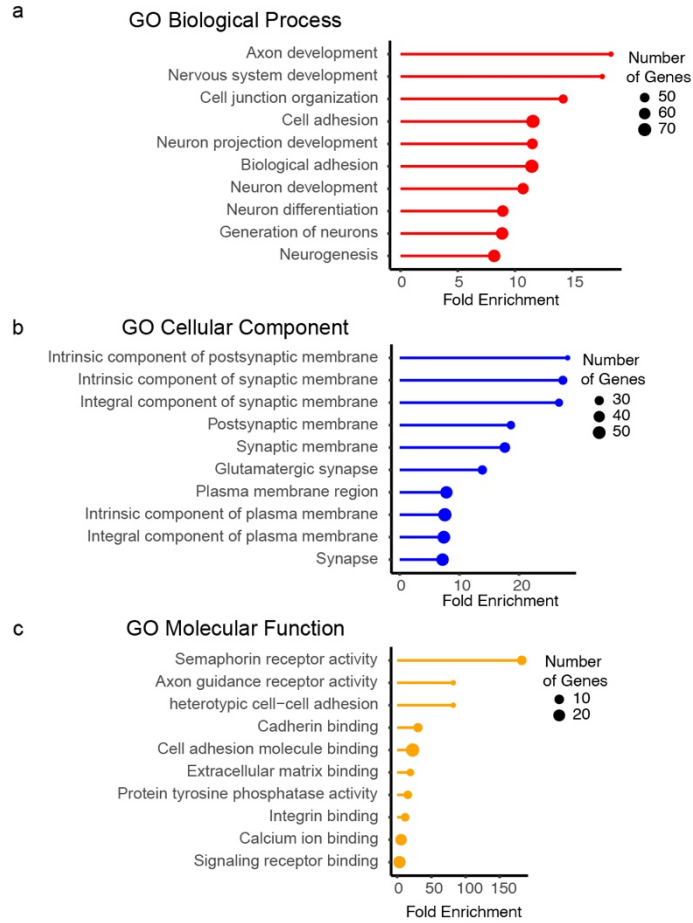

**Figure S4. Gene Ontology analysis at DIV14.** The top 100 genes by fold-enrichment analyzed using Biological Process (a), Cellular Component (b), and Molecular Function (c) pathway databases. Gene Ontology analysis was performed using ShinyGO v0.77.



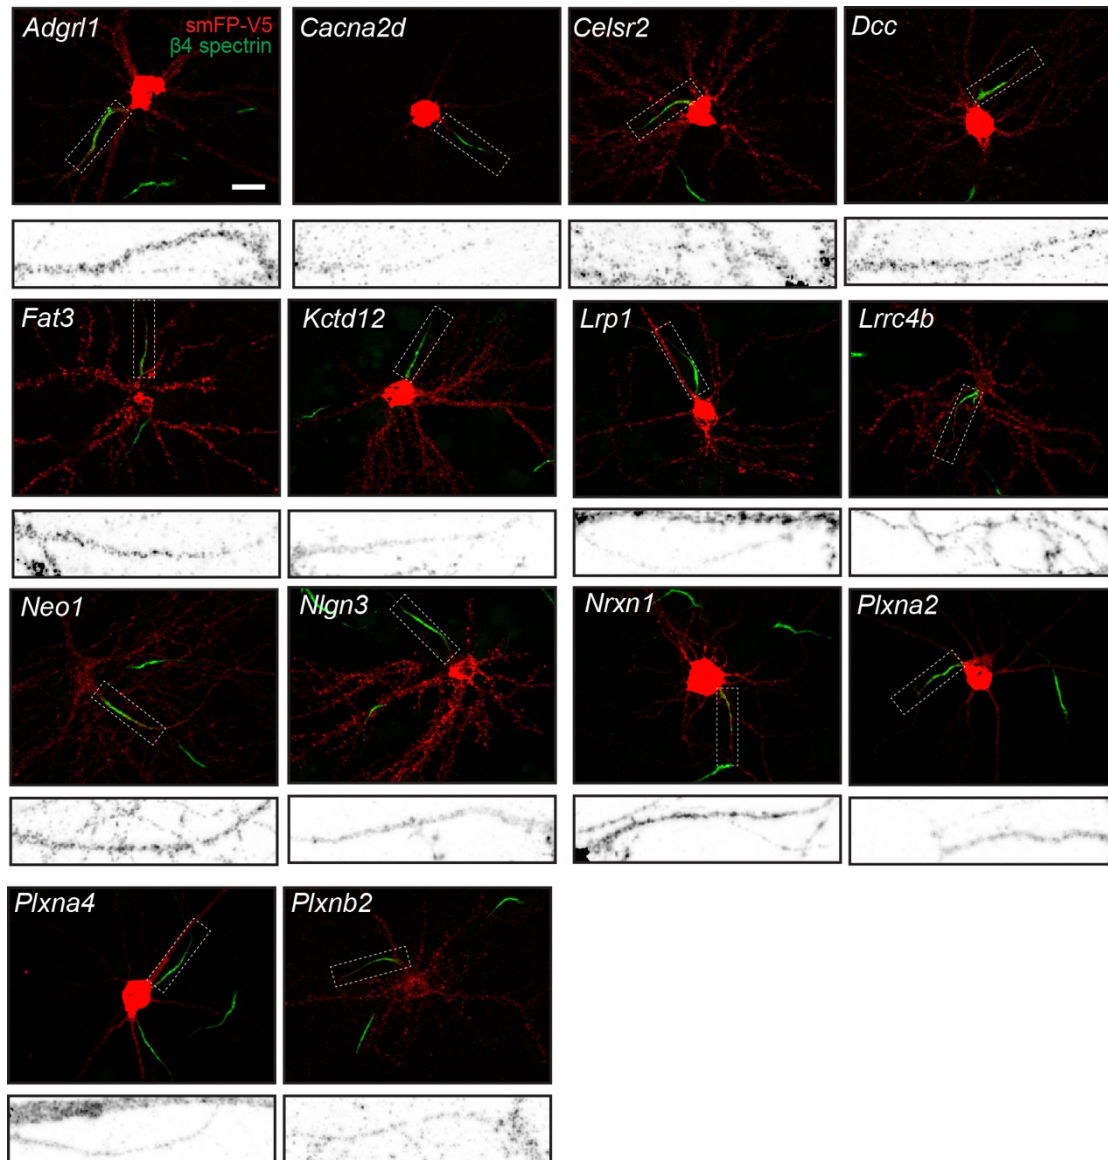

**Figure S5. Tagging of endogenous membrane proteins.** Examples of smFP-V5 tagged proteins (red). AIS are labeled for β4 spectrin (green). The inset boxed regions correspond to the tagged protein at the AIS. Neurons were transfected at DIV0 and fixed at DIV21. N=2 independent experiments with two independent viruses targeting each gene of interest. Scale bar, 20 μm.

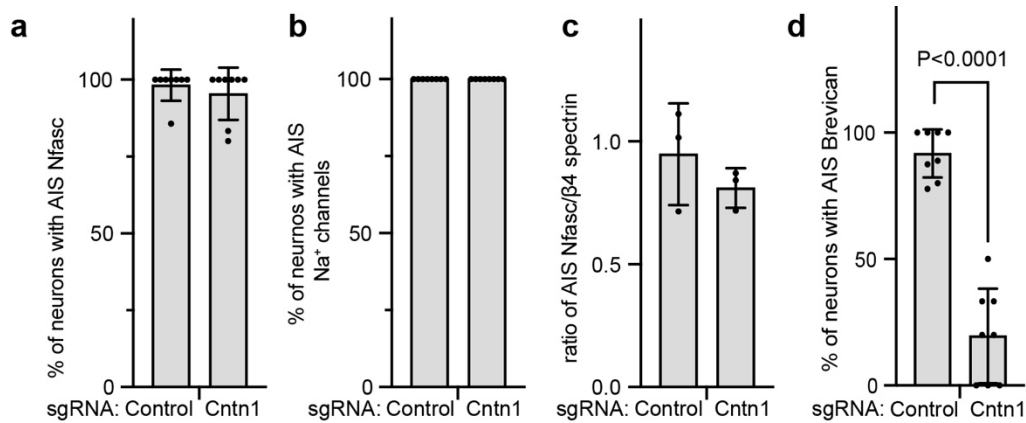

**Figure S6. Loss of AIS Cntn1 has no effect on AIS structure or position, but is essential for**

**Brevican recruitment.** **a, b,** The percentage of neurons with AIS Nfasc (**a**) or Na<sup>+</sup> channels (**b**) in control and Cntn1-deficient neurons. For AIS Nfasc, N=2 independent coverslips with 8 fields of view total; each dot represents a different field of view. n= 57 and 46 neurons, for control and Cntn1 sgRNA, respectively. Error bars, ±SEM, (t=0.798, df=14) p=0.4382. For AIS Na<sup>+</sup> channels, N=2 independent coverslips with 8 fields of view total; each dot represents a different field of view. n= 57 and 41 neurons, for control and Cntn1 sgRNA, respectively. All neurons analyzed in both conditions were labeled with AIS Na<sup>+</sup> channels. **c,** Loss of Cntn1 using CRISPR-mediated genome editing has no effect on the enrichment of AIS Nfasc. Quantification of the ratio of AIS Nfasc to β4 spectrin. N= 3 independent coverslips, with a total of 84 and 50 neurons for control and Cntn1 sgRNA, respectively. Error bars, ±SEM, Error bars, ±SEM, (t=0.1072, df=4) p=0.3440. **d,** The percentage of neurons with AIS Brevican in control and Cntn1-deficient neurons. N= 2 independent coverslips with 8 fields of view, with a total of 52 and 49 neurons for control and Cntn1 sgRNA, respectively. Error bars, ±SEM, (t=9.724, df=14) p=1.3X10<sup>-7</sup>. In all experiments neurons were transduced at DIV0 and analyzed at DIV21.

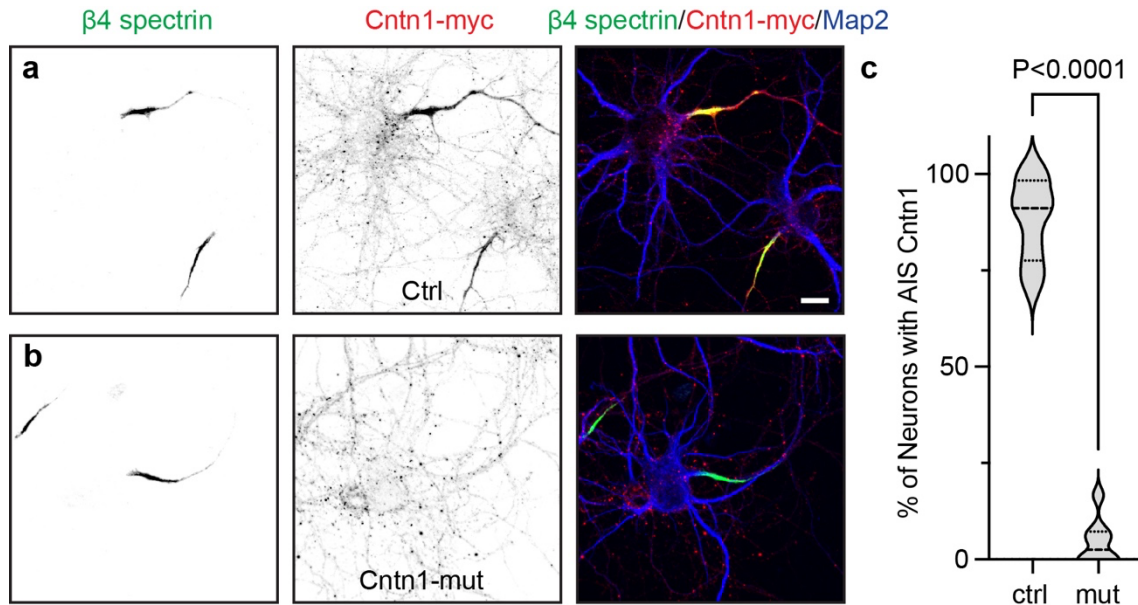

**Figure S7. Cntn1 mutants that cannot bind Nfasc fail to cluster at the AIS. a, b,**

Immunostaining of neurons transfected at DIV0 and fixed at DIV10 using Cntn1-myc (**a**) or a myc-tagged Cntn1-mut (**b**, a mutant Cntn1 with three point mutations disrupting Nfasc

interaction). AIS are labeled for β4 spectrin (green), myc (red) and Map2 (blue). Scale bar, 10

μm. **c**, The percentage of transduced neurons with Cntn1 enrichment at the AIS for Cntn1-myc or Cntn1-mut. N= 8 fields of view from 2 experiments; a total of 124 and 116 neurons

transduced with Cntn1-myc or Cntn1-mut, respectively, was measured. In the violin plot the

dashed lines indicate the median, while the dotted lines represent the first and third quartiles.

( $t=19.53$ ,  $df=14$ )  $p=1.5 \times 10^{-11}$ .

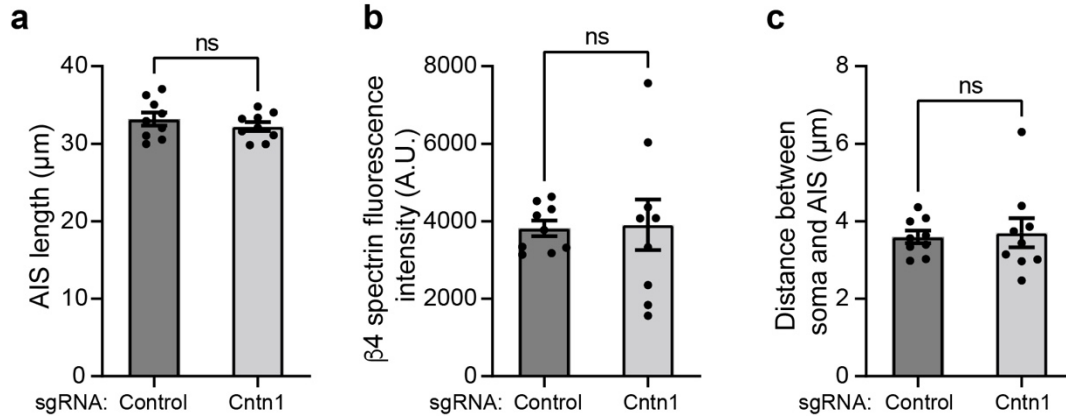

**Figure S8. Cntn1 depletion in PyNs does not affect AIS structure or position.** (a) Quantification of the average AIS length of HA+ PyNs in layer II/III of the somatosensory cortex from *Nkx2.1-creER;Ai9* mice co-electroporated at E15.5 with a plasmid expressing Cas9 and a plasmid expressing smFP-HA and a control sgRNA or Cntn1 sgRNA; mice were sacrificed at P17. β4-spectrin immunostaining was used for visualization and measurement of the AIS length. ( $t=0.9513$ ,  $df=16$ )  $p=0.3556$ . (b) Quantification of the relative integrated fluorescence intensity of β4-spectrin at the AIS of HA+ PyNs in layer II/III of the somatosensory cortex from *Nkx2.1-creER;Ai9* mice co-electroporated at E15.5 with plasmids indicated in (a) and sacrificed at P17. ( $t=0.135$ ,  $df=16$ )  $p=0.8943$ . (c) Quantification of the distance between the cell soma and the start of the AIS (defined by β4 spectrin immunolabeling) of HA+ PyNs in layer II/III of the somatosensory cortex from *Nkx2.1-creER;Ai9* mice co-electroporated at E15.5 with plasmids indicated in (a) and sacrificed at P17. ( $t=0.2600$ ,  $df=16$ )  $p=0.7982$ . For (a-c), 5 AISs from 3 fields of view from 3 animals were analyzed for each condition (Student's t tests). NS = not significant. Data are mean ± SEM.

## SUPPLEMENTARY MATERIALS AND REAGENTS

Reagents, antibodies, and plasmids used in this study are summarized below:

| REAGENT or RESOURCE                                         | SOURCE                             | IDENTIFIER                           |
|-------------------------------------------------------------|------------------------------------|--------------------------------------|
| <b>Antibodies</b>                                           |                                    |                                      |
| Mouse anti-AnkG (IgG2a)                                     | NeuroMab                           | Cat# 75-146; RRID: AB_10673030       |
| Mouse anti-Gephyrin (IgG1)                                  | Synaptic Systems                   | Cat# 147011; RRID: AB_887717         |
| Guinea pig anti-VGAT                                        | Synaptic Systems                   | Cat# 131004; RRID: AB_887873         |
| Guinea pig anti-Brevican                                    | Gift of Dr. Constanze Seidenbecher | N/A                                  |
| Rabbit monoclonal anti-HA                                   | Cell Signaling Technology          | Cat# 3724; RRID: AB_1549585          |
| Mouse anti-Myc                                              | MBL International Corporation      | Cat# M192<br>PRID: AB_11160947       |
| Mouse anti-PSD95                                            | Antibodies Incorporated            | Cat# 75-028<br>PRID: AB_2292909      |
| Mouse anti-Tenascin-R                                       | R&D Systems                        | Cat# MAB1624<br>RRID: AB_2207001     |
| Mouse anti-Tuj1                                             | BioLegend                          | Cat# 801202<br>RRID: AB_10063408     |
| Mouse anti-V5                                               | Invitrogen                         | Cat# R960CUS<br>RRID: AB_159298      |
| Rabbit anti- $\beta$ IV-Spectrin                            | Rasband lab                        | RRID: AB_2315634                     |
| Rabbit anti-Kv1.2                                           | Gift of Dr. James Trimmer          | RRID: 2756300                        |
| Rabbit anti-NrCAM                                           | Abcam                              | Cat# ab24344<br>RRID: AB_448024      |
| Chicken anti-MAP2                                           | Encor                              | Cat# CPCA-MAP2                       |
| Chicken anti-Neurofascin                                    | R&D Systems                        | Cat# AF3235<br>RRID: AB_10890736     |
| Goat anti-Cntn1                                             | R&D Systems                        | Cat# AF904<br>RRID: AB_2292070       |
| Rat anti-HA                                                 | Millipore Sigma                    | Cat# 11867423001<br>RRID: AB_390918  |
| HRP-conjugated goat anti-chicken IgY                        | Aves Labs                          | Cat# H-1004<br>RRID: AB_2313517      |
| HRP-conjugated goat anti-rabbit IgG                         | Jackson ImmunoResearch Labs        | Cat# 111-035-003<br>PRID: AB_2313567 |
| Alexa Fluor 594 conjugated streptavidin                     | Thermo Fisher Scientific           | Cat# S11227                          |
| Aminomethylcoumarin (AMCA) conjugated goat anti-chicken IgY | Jackson ImmunoResearch Labs        | Cat# 103-155-155<br>RRID: AB_2337385 |
| Aminomethylcoumarin (AMCA) conjugated goat anti-rat IgG     | Thermo Fisher Scientific           | Cat# A21093<br>PRID: AB_2535748      |
| Alexa Fluor 488 conjugated goat anti-chicken IgY            | Jackson ImmunoResearch Labs        | Cat# 103-545-155<br>RRID: AB_2337390 |
| Alexa Fluor 488 conjugated goat anti-mouse IgG              | Thermo Fisher Scientific           | Cat# A11029<br>RRID: AB_2534088      |
| Alexa Fluor 488 conjugated goat anti-rabbit IgG             | Thermo Fisher Scientific           | Cat# A11034<br>RRID: AB_2758380      |
| Alexa Fluor Plus 594 conjugated goat anti-mouse IgG         | Thermo Fisher Scientific           | Cat# A32742<br>RRID: AB_2762825      |

|                                                      |                          |                                   |
|------------------------------------------------------|--------------------------|-----------------------------------|
| Alexa Fluor 594 conjugated donkey anti-goat IgG      | Thermo Fisher Scientific | Cat# A11058<br>RRID: AB_2758385   |
| Alexa Fluor 488 conjugated goat anti-rat             | Thermo Fisher Scientific | Cat# A-11006; RRID:<br>AB_2534074 |
| Alexa Fluor Plus 555 conjugated goat anti-rabbit     | Thermo Fisher Scientific | Cat# A32732; RRID:<br>AB_2633281  |
| Alexa Fluor 647 conjugated goat anti-rabbit          | Thermo Fisher Scientific | Cat# A-21244; RRID:<br>AB_2535812 |
| Alexa Fluor 555 conjugated goat anti-guinea pig      | Thermo Fisher Scientific | Cat# A-21435; RRID:<br>AB_2535856 |
| Alexa Fluor 647 conjugated goat anti-guinea pig      | Thermo Fisher Scientific | Cat# A-21450; RRID:<br>AB_2735091 |
| Alexa Fluor 647 conjugated goat anti-mouse IgG1      | Thermo Fisher Scientific | Cat# A-21240; RRID:<br>AB_2535809 |
| Alexa Fluor 488 conjugated goat anti-mouse IgG2a     | Thermo Fisher Scientific | Cat# A-21131; RRID:<br>AB_2535771 |
| <b>Bacterial and Virus Strains</b>                   |                          |                                   |
| Stellar competent cells                              | Takara                   | Cat# 636763                       |
| NEB® Stable Competent E. coli (High Efficiency)      | New England Biolabs      | Cat# C3040H                       |
| NEB® 5-alpha Competent E. coli (High Efficiency)     | New England Biolabs      | Cat# C2987H                       |
| AAV PHP.S encapsulated vectors                       | This paper               | N/A                               |
| AAV PHP.eB encapsulated vectors                      | This paper               | N/A                               |
| <b>Chemicals, Peptides, and Recombinant Proteins</b> |                          |                                   |
| Biotin tyramide                                      | Perkin Elmer             | Cat# NEL749A001KT                 |
| Neurobasal Medium                                    | Gibco                    | Cat# 21103-049                    |
| B-27 supplement                                      | Gibco                    | Cat# 17504-044                    |
| GlutaMax-I                                           | Gibco                    | Cat# 35050-061                    |
| Penicillin-Streptomycin                              | Gibco                    | Cat# 15140122                     |
| DMEM, high glucose, no glutamine                     | Gibco                    | Cat# 11960-044                    |
| Fetal bovine serum                                   | Cytiva                   | Cat# SH30109.03                   |
| 0.5% Trypsin-EDTA                                    | Gibco                    | Cat# 15400054                     |
| 2.5% trypsin                                         | Gibco                    | Cat# 15090046                     |
| Hank's buffered salt solution (HBSS)                 | Gibco                    | Cat# 14175-095                    |
| Poly-D-lysine                                        | Gibco                    | Cat# A3890401                     |
| Poly-L-lysine                                        | Sigma                    | Cat# P4832-50ML                   |
| Laminin                                              | Gibco                    | Cat# 23017015                     |
| Phosphate buffer saline (PBS)                        | Corning                  | Cat# 21-031-CV                    |
| Opti-MEM                                             | Thermo Fisher Scientific | Cat# 31985070                     |
| Hoechst 33258                                        | Thermo Fisher Scientific | Cat# H3569<br>RRID: AB_2651133    |
| Polyethylenimine (PEI)                               | Polysciences             | Cat# 24765-1                      |
| Normal goat serum                                    | Gibco                    | Cat# 16210-072                    |
| Gelatin from bovine skin                             | Sigma                    | G9382-100G                        |
| FastGreen                                            | Sigma                    | Cat# F7258                        |
| Streptavidin Mag Sepharose                           | GE Healthcare            | Cat# 28-9857-38                   |
| Vectashield plus anti-fade mounting media            | Vector labs              | Cat# H-1900                       |
| Sequencing Grade Trypsin                             | Promega                  | V5111                             |
| Tamoxifen                                            | Sigma-Aldrich            | Cat# T5648; CAS:<br>10540-29-1    |

|                                                                 |                                                                 |                                             |
|-----------------------------------------------------------------|-----------------------------------------------------------------|---------------------------------------------|
| Fluoromount-G                                                   | Southern Biotech                                                | 0100-01                                     |
| <b>Critical Commercial Assays</b>                               |                                                                 |                                             |
| Q5 High-Fidelity DNA Polymerase                                 | New England Biolabs                                             | Cat# M0491S                                 |
| CloneAmp HiFi PCR Premix                                        | Takara                                                          | Cat# 639298                                 |
| NucleoSpin Plasmid Transfection-grade                           | Takara                                                          | Cat# 740490.250                             |
| In-Fusion Snap Assembly Master Mix                              | Takara                                                          | Cat# 638947                                 |
| Gel purification                                                | Cytiva                                                          | 28903470                                    |
| Amicon Ultra-15 Centrifugal Filter Unit 100 kDa                 | Millipore                                                       | Cat# UFC910008                              |
| C18 ZipTips                                                     | Millipore                                                       | Cat# ZTC18S096                              |
| BamHI restriction enzyme                                        | New England Biolabs                                             | Cat# R3136T                                 |
| EcoRI restriction enzyme                                        | New England Biolabs                                             | Cat# R3101T                                 |
| NotI restriction enzyme                                         | New England Biolabs                                             | Cat# R3189L                                 |
| XhoI restriction enzyme                                         | New England Biolabs                                             | Cat# R0146M                                 |
| <b>Experimental models: Cell Lines</b>                          |                                                                 |                                             |
| HEK293T cells                                                   | Provided from Baylor College of Medicine Neuroconnectivity Core | N/A                                         |
| <b>Experimental models: Organisms/ Strains</b>                  |                                                                 |                                             |
| Rat: Sprague-Dawley rat embryos                                 | Charles River Laboratories                                      | SAS-SD                                      |
| Mouse: C57BL/6                                                  | Baylor College of Medicine Center for Comparative Medicine      | N/A                                         |
| Mouse: CFW (Swiss Webster)                                      | Charles River                                                   | Cat# CRL:24; RRID: IMSR_CRL:24              |
| Mouse: Nkx2-1 <sup>tm1.1(Cre/ERT2)Zjh/J</sup>                   | Gift from Z.J. Huang; (Taniguchi et al., 2013)                  | JAX: 014552; RRID: IMSR_JAX:014552          |
| Mouse: B6;129S6-Gt(Rosa)26Sor <sup>tm9(CAG-tdTomato)Hze/J</sup> | Gift from Z.J. Huang; (Taniguchi et al., 2013)                  | JAX: 007905; RRID: IMSR_JAX:007905          |
| Mouse: Igs2tm1.1(CAG-cas9*)Mmw/J (also known as H11Cas9 mice)   | The Jackson Laboratory                                          | Cat# JAX: 027650<br>RRID: IMSR_JAX:027650   |
| Mouse: Cntn1 knockout                                           | Boyle et al., 2001                                              | Cat# JAX: q034216,<br>RRID: IMSR_JAX:034216 |
| Mouse: ICR                                                      | Baylor College of Medicine Center for Comparative Medicine      | N/A                                         |
| <b>Recombinant DNA plasmids</b>                                 |                                                                 |                                             |
| PX551 (AAV-SpCas9)                                              | Gift of Dr. Feng Zhang                                          | Addgene #60957                              |
| PX552 (pAAV-U6sgRNA(SapI)_hSyn-GFP-KASH-bGH)                    | Gift of Dr. Feng Zhang                                          | Addgene #60958                              |
| pCAG-1BP-NLS-Cas9-1BP-NLS                                       | Gift of Dr. Juan Belmonte                                       | Addgene #87108                              |
| pCAG_smFP HA                                                    | Gift of Dr. Loren Looger                                        | Addgene #59759                              |
| pCAG_smFP V5                                                    | Gift of Dr. Loren Looger                                        | Addgene #59758                              |
| pMJ114                                                          | Gift of Dr. Jonathan Weissman                                   | Addgene #85995                              |
| pMJ117                                                          | Gift of Dr. Jonathan Weissman                                   | Addgene #85997                              |
| pMJ179                                                          | Gift of Dr. Jonathan Weissman                                   | Addgene #85996                              |
| pUCmini-iCAP-PHP.S                                              | Gift of Dr. Viviana Gradinaru                                   | Addgene #103002                             |
| pUCmini-iCAP-PHP.eB                                             | Gift of Dr. Viviana Gradinaru                                   | Addgene #103005                             |
| pHelper                                                         | Agilent Technologies                                            | Cat #240071                                 |

|                                                   |                            |                                                                                                                                                                                                                    |
|---------------------------------------------------|----------------------------|--------------------------------------------------------------------------------------------------------------------------------------------------------------------------------------------------------------------|
| Knock-in sgRNA and donor plasmid                  | This paper                 | N/A                                                                                                                                                                                                                |
| pAAV-3x-gRNA-smFP                                 | This paper                 | N/A                                                                                                                                                                                                                |
| rat contactin-myc                                 | Gift of Dr. Elior Peles    | N/A                                                                                                                                                                                                                |
| pAAV-hSyn-EGFP                                    | Gift of Dr. Bryan Roth     | Addgene # 5046                                                                                                                                                                                                     |
| pcDNA3                                            | Invitrogen                 | N/A                                                                                                                                                                                                                |
| hSYNp-Cntn1-Myc full-length                       | This paper                 | N/A                                                                                                                                                                                                                |
| hSYNp-Cntn1-Myc truncates                         | This paper                 | N/A                                                                                                                                                                                                                |
| <b>Software and Algorithms</b>                    |                            |                                                                                                                                                                                                                    |
| Fiji                                              | NIH                        | <a href="https://fiji.sc/">https://fiji.sc/</a>                                                                                                                                                                    |
| Zeiss Zen (Blue Edition) Imaging Software         | Zeiss                      | <a href="http://www.zeiss.com/microscopy/en_us/products/microscope-software/zen.html#introduction">http://www.zeiss.com/microscopy/en_us/products/microscope-software/zen.html#introduction</a> ; RRID: SCR_013672 |
| NIS Elements Imaging Software                     | Nikon                      | <a href="https://www.microscope.healthcare.nikon.com/products/software/nis-elements">https://www.microscope.healthcare.nikon.com/products/software/nis-elements</a>                                                |
| CRISPOR                                           | Haeussler et al., 2016     | <a href="http://crispor.tefor.net/crispor.py">http://crispor.tefor.net/crispor.py</a>                                                                                                                              |
| Adobe Photoshop (version 23.5.1)                  | Adobe                      | <a href="https://www.adobe.com/products/photoshop.html">https://www.adobe.com/products/photoshop.html</a>                                                                                                          |
| Adobe Illustrator (version 26.5)                  | Adobe                      | <a href="https://www.adobe.com/products/illustrator.html">https://www.adobe.com/products/illustrator.html</a>                                                                                                      |
| GraphPad Prism 9                                  | GraphPad                   | <a href="https://www.graphpad.com/">https://www.graphpad.com/</a>                                                                                                                                                  |
| MATLAB                                            | Mathworks                  | <a href="https://www.mathworks.com/products/matlab.html">https://www.mathworks.com/products/matlab.html</a>                                                                                                        |
| Python                                            | Python Software Foundation | <a href="https://www.python.org/">https://www.python.org/</a>                                                                                                                                                      |
| Script for calculation of extracellular tyrosines | Rasband lab                | <a href="https://github.com/jrasband/extracellular-tyrosines">https://github.com/jrasband/extracellular-tyrosines</a>                                                                                              |
| BioRender                                         | BioRender                  | <a href="https://biorender.com/">https://biorender.com/</a>                                                                                                                                                        |
| ShinyGO v0.77                                     | ShinyGO                    | <a href="http://bioinformatics.sdsu.edu/go/">http://bioinformatics.sdsu.edu/go/</a>                                                                                                                                |
| <b>Other</b>                                      |                            |                                                                                                                                                                                                                    |
| Axiomager Z2 with Apotome                         | Zeiss                      |                                                                                                                                                                                                                    |
| Ni2 upright fluorescence microscope               | Nikon                      |                                                                                                                                                                                                                    |
| Microtome HM450                                   | Thermo Scientific          |                                                                                                                                                                                                                    |
| Cryostat CryoStar NX70                            | Thermo Scientific          |                                                                                                                                                                                                                    |
| QExactive Plus                                    | Thermo Scientific          |                                                                                                                                                                                                                    |
| NanoAcquity Ultra Performance UPLC system         | Waters                     |                                                                                                                                                                                                                    |
| 15-cm EasySpray C18 column                        | Thermo Scientific          |                                                                                                                                                                                                                    |
