# Supplementary material for: Antibody-directed extracellular proximity biotinylation reveals that Contactin-1 regulates axo-axonic innervation of axon initial segments
Source: PubMed Central journal article supplement (PMC10603070; doi:10.1038/s41467-023-42273-8), 2023-10-26
Supplement: 41467_2023_42273_MOESM3_ESM.pdf [file 41467_2023_42273_MOESM3_ESM.pdf]

## **Description of Additional Supplementary Files**

File Name: Supplementary Data 1

Description: Comparison of Nfasc-BAR with NrCAM-BAR.

File Name: Supplementary Data 2

Description: Proteomics results from Nfasc-BAR across development.

File Name: Supplementary Data 3

Description: fold-change and statistical comparison across development. Data were used to generate volcano plots.

File Name: Supplementary Data 4

Description: gRNA sequences used in this study.
