# Supplementary material for: Antibody-directed extracellular proximity biotinylation reveals that Contactin-1 regulates axo-axonic innervation of axon initial segments
Source: PubMed Central journal article supplement (PMC10603070; doi:10.1038/s41467-023-42273-8), 2023-10-26
Supplement: 41467_2023_42273_MOESM8_ESM.pdf [file 41467_2023_42273_MOESM8_ESM.pdf]

## Reporting Summary

Nature Portfolio wishes to improve the reproducibility of the work that we publish. This form provides structure for consistency and transparency in reporting. For further information on Nature Portfolio policies, see our [Editorial Policies](#) and the [Editorial Policy Checklist](#).

### Statistics

For all statistical analyses, confirm that the following items are present in the figure legend, table legend, main text, or Methods section.

n/a Confirmed

- The exact sample size ( $n$ ) for each experimental group/condition, given as a discrete number and unit of measurement
- A statement on whether measurements were taken from distinct samples or whether the same sample was measured repeatedly
- The statistical test(s) used AND whether they are one- or two-sided  
*Only common tests should be described solely by name; describe more complex techniques in the Methods section.*
- A description of all covariates tested
- A description of any assumptions or corrections, such as tests of normality and adjustment for multiple comparisons
- A full description of the statistical parameters including central tendency (e.g. means) or other basic estimates (e.g. regression coefficient) AND variation (e.g. standard deviation) or associated estimates of uncertainty (e.g. confidence intervals)
- For null hypothesis testing, the test statistic (e.g.  $F$ ,  $t$ ,  $r$ ) with confidence intervals, effect sizes, degrees of freedom and  $P$  value noted  
*Give  $P$  values as exact values whenever suitable.*
- For Bayesian analysis, information on the choice of priors and Markov chain Monte Carlo settings
- For hierarchical and complex designs, identification of the appropriate level for tests and full reporting of outcomes
- Estimates of effect sizes (e.g. Cohen's  $d$ , Pearson's  $r$ ), indicating how they were calculated

*Our web collection on [statistics for biologists](#) contains articles on many of the points above.*

### Software and code

Policy information about [availability of computer code](#)

#### Data collection

For microscopy the following software was used:

1. Zeiss Zen (Blue Edition) Imaging Software Zeiss [http://www.zeiss.com/microscopy/en\\_us/products/microscope-software/zen.html#introduction](http://www.zeiss.com/microscopy/en_us/products/microscope-software/zen.html#introduction); RRID: SCR\_013672
2. NIS Elements Imaging Software Nikon <https://www.microscope.healthcare.nikon.com/products/software/nis-elements>

#### Data analysis

For data analysis the following software tools were used or generated:

1. Fiji NIH (version 2.14.0/1.54d) <https://fiji.sc/>
2. CRISPOR (version 5.01) Haeussler et al., 2016 <http://crispor.tefor.net/crispor.py>
3. Adobe Photoshop (version 23.5.1) Adobe <https://www.adobe.com/products/photoshop.html>
4. Adobe Illustrator (version 26.5) Adobe <https://www.adobe.com/products/illustrator.html>
5. GraphPad Prism 9 GraphPad <https://www.graphpad.com/>
6. MATLAB Mathworks <https://www.mathworks.com/products/matlab.html>
7. Python Python Software Foundation <https://www.python.org/>
8. Script for calculation of extracellular tyrosines Rasband lab <https://github.com/jrasband/extracellular-tyrosines>
9. BioRender BioRender <https://biorender.com/>
10. ShinyGO v0.77 ShinyGO <http://bioinformatics.sdstate.edu/go/>

For manuscripts utilizing custom algorithms or software that are central to the research but not yet described in published literature, software must be made available to editors and reviewers. We strongly encourage code deposition in a community repository (e.g. GitHub). See the Nature Portfolio [guidelines for submitting code & software](#) for further information.

## Data

Policy information about [availability of data](#)

All manuscripts must include a [data availability statement](#). This statement should provide the following information, where applicable:

- Accession codes, unique identifiers, or web links for publicly available datasets
- A description of any restrictions on data availability
- For clinical datasets or third party data, please ensure that the statement adheres to our [policy](#)

All data generated or analyzed during this study are included in this published article. All proteomics data have been deposited to the ProteomeXchange Consortium via the PRIDE partner repository with the identifier PXD043805. Supplemental material including all PSMs are including in the supplemental tables. The source data underlying Figs. 4c-d, 6d, h, k, 7d, f, i, 8c, 9d, f, h, S1b, S6a-d, S7c-d, S8a-c are provided in the Source Data file.

## Research involving human participants, their data, or biological material

Policy information about studies with [human participants or human data](#). See also policy information about [sex, gender \(identity/presentation\), and sexual orientation](#) and [race, ethnicity and racism](#).

|                                                                    |     |
|--------------------------------------------------------------------|-----|
| Reporting on sex and gender                                        | N/A |
| Reporting on race, ethnicity, or other socially relevant groupings | N/A |
| Population characteristics                                         | N/A |
| Recruitment                                                        | N/A |
| Ethics oversight                                                   | N/A |

Note that full information on the approval of the study protocol must also be provided in the manuscript.

## Field-specific reporting

Please select the one below that is the best fit for your research. If you are not sure, read the appropriate sections before making your selection.

Life sciences       Behavioural & social sciences       Ecological, evolutionary & environmental sciences

For a reference copy of the document with all sections, see [nature.com/documents/nr-reporting-summary-flat.pdf](https://www.nature.com/documents/nr-reporting-summary-flat.pdf)

## Life sciences study design

All studies must disclose on these points even when the disclosure is negative.

|                 |                                                                                                                                                                                                                                                                                                                                                                                                                       |
|-----------------|-----------------------------------------------------------------------------------------------------------------------------------------------------------------------------------------------------------------------------------------------------------------------------------------------------------------------------------------------------------------------------------------------------------------------|
| Sample size     | Sample size N were independent experiments or animals. In some experiments n were the number of cells counted in a given experiment. No statistical tests were used to predetermine sample sizes as the research is exploratory and no prior experiment could be referred to. In some instances, sample sizes were determined based on prior publications performing similar analyses (e.g. Tai et al., Neuron 2019). |
| Data exclusions | no data were excluded from the analyses.                                                                                                                                                                                                                                                                                                                                                                              |
| Replication     | Both biological and technical replicates were performed. The number of independent experiments used to replicate studies is reported in the methods or figure legends. Mouse models, consistent biological replicates, materials and quantities used, and methodology were all provided in full transparency for ease of replication by others.                                                                       |
| Randomization   | There was no randomization as all conditions were included in each experiment                                                                                                                                                                                                                                                                                                                                         |
| Blinding        | In all experiments using sgRNA knockout of Cntn1 or other genes, investigators were blinded to treatment (e.g. data presented in Figs. 6, S6, 7, S7, 9, and S8). It was not possible to be blinded to the genotype of Cntn1 KO mice (Fig. 8 since changes to Pinceau structure were so obvious).                                                                                                                      |

## Reporting for specific materials, systems and methods

We require information from authors about some types of materials, experimental systems and methods used in many studies. Here, indicate whether each material, system or method listed is relevant to your study. If you are not sure if a list item applies to your research, read the appropriate section before selecting a response.

## Materials &amp; experimental systems

## Methods

| n/a                                 | Involved in the study                                           |
|-------------------------------------|-----------------------------------------------------------------|
| <input type="checkbox"/>            | <input checked="" type="checkbox"/> Antibodies                  |
| <input type="checkbox"/>            | <input checked="" type="checkbox"/> Eukaryotic cell lines       |
| <input checked="" type="checkbox"/> | <input type="checkbox"/> Palaeontology and archaeology          |
| <input type="checkbox"/>            | <input checked="" type="checkbox"/> Animals and other organisms |
| <input checked="" type="checkbox"/> | <input type="checkbox"/> Clinical data                          |
| <input checked="" type="checkbox"/> | <input type="checkbox"/> Dual use research of concern           |
| <input checked="" type="checkbox"/> | <input type="checkbox"/> Plants                                 |

| n/a                                 | Involved in the study                           |
|-------------------------------------|-------------------------------------------------|
| <input checked="" type="checkbox"/> | <input type="checkbox"/> ChIP-seq               |
| <input checked="" type="checkbox"/> | <input type="checkbox"/> Flow cytometry         |
| <input checked="" type="checkbox"/> | <input type="checkbox"/> MRI-based neuroimaging |

## Antibodies

## Antibodies used

Mouse anti-AnkG (IgG2a) NeuroMab Cat# 75-146; RRID: AB\_10673030  
 Mouse anti-Gephyrin (IgG1) Synaptic Systems Cat# 147011; RRID: AB\_887717  
 Guinea pig anti-VGAT Synaptic Systems Cat# 131004; RRID: AB\_887873  
 Guinea pig anti-Brevican Gift of Dr. Constanze Seidenbecher N/A  
 Rabbit monoclonal anti-HA Cell Signaling Technology Cat# 3724; RRID: AB\_1549585  
 Mouse anti-Myc MBL International Corporation Cat# M192  
 PRID: AB\_11160947  
 Mouse anti-PSD95 Antibodies Incorporated Cat# 75-028  
 PRID: AB\_2292909  
 Mouse anti-Tenascin-R R&D Systems Cat# MAB1624  
 RRID: AB\_2207001  
 Mouse anti-Tuj1 BioLegend Cat# 801202  
 RRID: AB\_10063408  
 Mouse anti-V5 Invitrogen Cat# R960CUS  
 RRID: AB\_159298  
 Rabbit anti- $\beta$ IV-Spectrin Rasband lab RRID: AB\_2315634  
 Rabbit anti-Kv1.2 Gift of Dr. James Trimmer RRID: 2756300  
 Rabbit anti-NrCAM Abcam Cat# ab24344  
 RRID: AB\_448024  
 Chicken anti-MAP2 Encor Cat# CPCA-MAP2  
 Chicken anti-Neurofascin R&D Systems Cat# AF3235  
 RRID: AB\_10890736  
 Goat anti-Cntn1 R&D Systems Cat# AF904  
 RRID: AB\_2292070  
 Rat anti-HA Millipore Sigma Cat# 11867423001  
 RRID: AB\_390918  
 HRP-conjugated goat anti-chicken IgY Aves Labs Cat# H-1004  
 RRID: AB\_2313517  
 HRP-conjugated goat anti-rabbit IgG Jackson ImmunoResearch Labs Cat# 111-035-003  
 PRID: AB\_2313567  
 Alexa Fluor 594 conjugated streptavidin Thermo Fisher Scientific Cat# S11227  
 Aminomethylcoumarin (AMCA) conjugated goat anti-chicken IgY Jackson ImmunoResearch Labs Cat# 103-155-155  
 RRID: AB\_2337385  
 Aminomethylcoumarin (AMCA) conjugated goat anti-rat IgG Thermo Fisher Scientific Cat# A21093  
 PRID: AB\_2535748  
 Alexa Fluor 488 conjugated goat anti-chicken IgY Jackson ImmunoResearch Labs Cat# 103-545-155  
 RRID: AB\_2337390  
 Alexa Fluor 488 conjugated goat anti-mouse IgG Thermo Fisher Scientific Cat# A11029  
 RRID: AB\_2534088  
 Alexa Fluor 488 conjugated goat anti-rabbit IgG Thermo Fisher Scientific Cat# A11034  
 RRID: AB\_2758380  
 Alexa Fluor Plus 594 conjugated goat anti-mouse IgG Thermo Fisher Scientific Cat# A32742  
 RRID: AB\_2762825  
 Alexa Fluor 594 conjugated donkey anti-goat IgG Thermo Fisher Scientific Cat# A11058  
 RRID: AB\_2758385  
 Alexa Fluor 488 conjugated goat anti-rat Thermo Fisher Scientific Cat# A-11006; RRID:  
 AB\_2534074  
 Alexa Fluor Plus 555 conjugated goat anti-rabbit Thermo Fisher Scientific Cat# A32732; RRID: AB\_2633281  
 Alexa Fluor 647 conjugated goat anti-rabbit Thermo Fisher Scientific Cat# A-21244; RRID: AB\_2535812  
 Alexa Fluor 555 conjugated goat anti-guinea pig Thermo Fisher Scientific Cat# A-21435; RRID: AB\_2535856  
 Alexa Fluor 647 conjugated goat anti-guinea pig Thermo Fisher Scientific Cat# A-21450; RRID:  
 AB\_2735091  
 Alexa Fluor 647 conjugated goat anti-mouse IgG1 Thermo Fisher Scientific Cat# A-21240; RRID:  
 AB\_2535809  
 Alexa Fluor 488 conjugated goat anti-mouse IgG2a Thermo Fisher Scientific Cat# A-21131; RRID: AB\_2535771

## Validation

Antibodies against AnkG are knockout validated. See Chang et al., Nat Neurosci 17:1673-81 (2014)

Antibodies against Neurofascin are knockout validated. See Amor et al., eLIFE 6:e21392 (2017).

Antibodies against Gephyrin are knockout validated. See Feng et al., Science 282:1321-4 (1998)

Antibodies against Brevican are knockout validated. see Susuki et al., Neuron 2013.

Antibodies against PSD95 are knockout validated ([https://neuromab.ucdavis.edu/datasheet/K28\\_43.pdf](https://neuromab.ucdavis.edu/datasheet/K28_43.pdf))

Antibodies against  $\beta$ IV-Spectrin are knockout validated, see Yang et al., J Neurosci 24:7230-7240 (2004).

Rabbit anti-Kv1.2 Gift of Dr. James Trimmer RRID: 2756300

Map2, Tuj1, Tenascin-R, and VGAT antibodies were validated by immunolabeling and/or immunoblot consistent with their data sheets: MAP2 (<http://encorbio.com/products/cpca-map2/>), Tuj1 (<https://www.biolegend.com/en-us/products/purified-anti-tubulin-beta-3-tubb3-antibody-11580>), Tnr ([https://www.rndsystems.com/products/mouse-rat-tenascin-r-antibody-619\\_mab1624#product-details](https://www.rndsystems.com/products/mouse-rat-tenascin-r-antibody-619_mab1624#product-details)), VGAT (<https://sysy.com/product/131004>).

Antibodies against Cntn1 and NrCAM were validated in this paper using sgRNA knockout. See Figures 6b-d and 7e-f.

Antibodies against HA, V5, myc, RFP, and GFP were validated by transfecting cells with plasmids expressing proteins fused to these tags. Both immunostaining and immunoblots were used to validate the antibodies.

All secondary antibodies were validated by testing for binding against their target primary antibody species without cross-reactivity against other species.

## Eukaryotic cell lines

Policy information about [cell lines and Sex and Gender in Research](#)

Cell line source(s)

HEK293T cells were obtained from ATCC.

Authentication

Cell lines were not authenticated.

Mycoplasma contamination

cells lines were not tested for mycoplasma contamination.

Commonly misidentified lines  
(See [ICLAC](#) register)

*Name any commonly misidentified cell lines used in the study and provide a rationale for their use.*

## Animals and other research organisms

Policy information about [studies involving animals](#); [ARRIVE guidelines](#) recommended for reporting animal research, and [Sex and Gender in Research](#)

Laboratory animals

Rat: Sprague-Dawley rat embryos Charles River Laboratories SAS-SD  
 Mouse: C57BL/6 Baylor College of Medicine Center for Comparative Medicine N/A  
 Mouse: CFW (Swiss Webster) Charles River Cat# CRL:24; RRID: IMSR\_CRL:24  
 Mouse: Nkx2-1tm1.1(Cre/ERT2)Zjh/J Gift from Z.J. Huang;  
 (Taniguchi et al., 2013)  
 JAX: 014552; RRID: IMSR\_JAX:014552  
 Mouse: B6;129S6-Gt(Rosa)26Sortm9(CAG-tdTomato)Hze/J Gift from Z.J. Huang;  
 (Taniguchi et al., 2013)  
 JAX: 007905; RRID: IMSR\_JAX:007905  
 Mouse: lgs2tm1.1(CAG-cas9\*)Mmw/J  
 (also known as H11Cas9 mice) The Jackson Laboratory Cat# JAX: 027650  
 RRID: IMSR\_JAX:027650  
 Mouse: Cntn1 knockout Boyle et al., 2001 Cat# JAX: q034216, RRID: IMSR\_JAX:034216  
 Mouse: ICR Baylor College of Medicine Center for Comparative Medicine N/A

Ages of mice used: Fig. 6g,h, 13 weeks; Fig. 6j,k P0; Fig. 8, P17; Fig. 9, P17.  
 Ages of rats to generate primary neurons: adult rats and E18.5 embryos.

mice were maintained in a facility with a 12h light/12 h dark cycle. Room temperatures were ~22 C with 40-60% humidity.

Wild animals

no wild animals were used in the study

Reporting on sex

There was no consideration of sex for primary neuronal cultures. Cultures were mixed. For Cntn1 KO mice sex was also not considered since it was so difficult to obtain KO mice (they usually died prior to our ability to analyze them), therefore we used whatever sex was available. We also did not consider sex in the in utero electroporation experiments.

Field-collected samples

no field collected samples were used in the study

Ethics oversight

All animal studies were approved by Baylor College of Medicines IACUC and performed in accordance with the NIH guide for the humane care and use of animals. Protocol number AN-4634. Some experiments were performed at Cold Spring Harbor labs using animal protocol number 22-19-16-13-10-06-7. Some experiments were performed at the Weizmann Institute of Science using animal protocol number 00530121.

Note that full information on the approval of the study protocol must also be provided in the manuscript.
